# Supplementary material for: Avian thermoregulation in the heat: resting metabolism, evaporative cooling, and heat tolerance in Sonoran Desert songbirds
Source: Oxford University Press journal article supplement (doi:10.1242/jeb.161141), 2017-01-01
Supplement: jeb161141supp.pdf [file jeb161141supp.pdf]

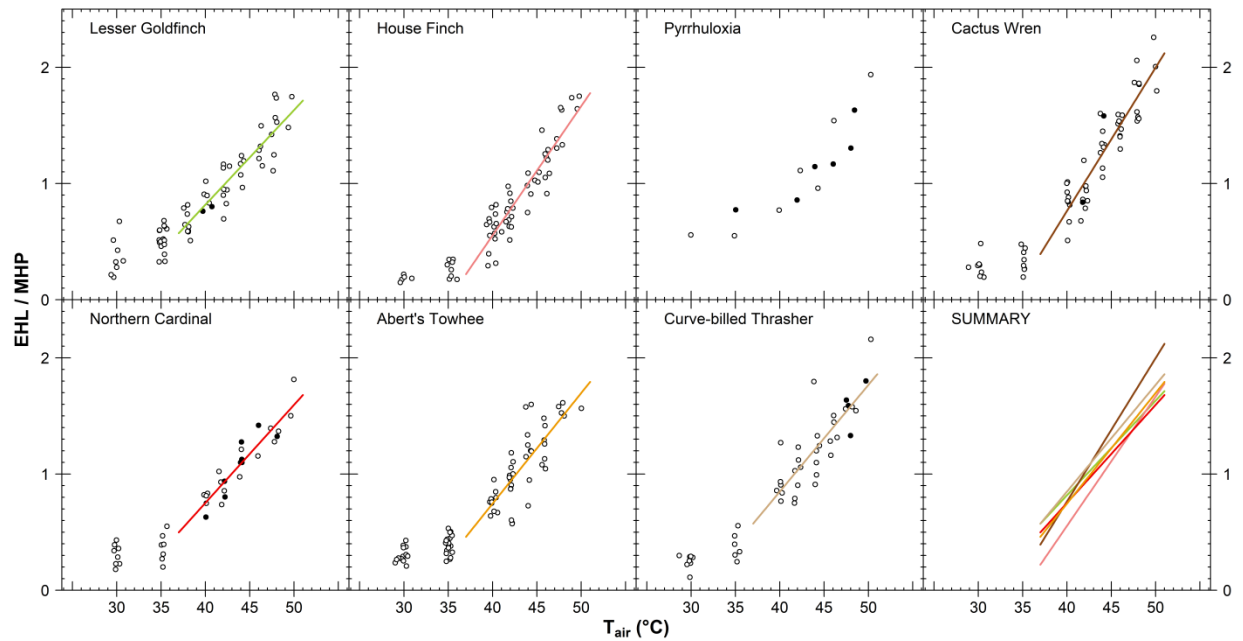

**Fig. S1. Evaporative cooling capacity (EHL/MHP) as a function of air temperature in Lesser Goldfinch, House Finch, Pyrrhuloxia, Cactus Wren, Northern Cardinal, Abert's Towhee, and Curve-billed Thrasher.** EHL/MHP was regressed against  $T_{\text{air}}$  above  $36^{\circ}\text{C}$  (all  $P < 0.001$ ). The solid circles represent more active birds (activity score = 2) and are included in all regressions and parameter estimates. See text for statistical details of linear regressions and Table S3 for parameter estimates.

**Table S1.** Slope (m) and intercept (b) for the relationship of mass independent residuals of resting metabolic rate (RMRr) and evaporative water loss rate (EWLr) in response to air temperature above the upper critical temperature ( $T_{uc}$ , determined from RMRr) in 7 species of Sonoran Desert passerine birds.

| Species               | $T_{uc}$ (°C)         | regression          | m                     | b                        |
|-----------------------|-----------------------|---------------------|-----------------------|--------------------------|
| Lesser Goldfinch      | 36.17 ( 33.98 38.36 ) | RMRr ( $> T_{uc}$ ) | 0.009 ( 0.005 0.013 ) | -0.39 ( -0.56 -0.22 )    |
| House Finch           | 39.33 ( 35.06 43.61 ) | RMRr ( $> T_{uc}$ ) | 0.015 ( 0.011 0.019 ) | -0.63 ( -0.82 -0.45 )    |
| Pyrrhuloxia           | 39.73 ( 17.48 61.97 ) | RMRr ( $> T_{uc}$ ) | 0.024 ( 0.010 0.039 ) | -1.04 ( -1.70 -0.38 )    |
| Cactus Wren           | 37.00 ( 35.03 38.97 ) | RMRr ( $> T_{uc}$ ) | 0.016 ( 0.011 0.021 ) | -0.76 ( -0.96 -0.55 )    |
| Northern Cardinal     | 37.03 ( 33.75 40.31 ) | RMRr ( $> T_{uc}$ ) | 0.038 ( 0.027 0.049 ) | -1.57 ( -2.06 -1.08 )    |
| Abert's Towhee        | 36.73 ( 34.22 39.24 ) | RMRr ( $> T_{uc}$ ) | 0.018 ( 0.008 0.029 ) | -0.73 ( -1.19 -0.27 )    |
| Curve-billed Thrasher | 42.61 ( 40.22 45.00 ) | RMRr ( $> T_{uc}$ ) | 0.071 ( 0.034 0.107 ) | -3.17 ( -4.84 -1.49 )    |
| Lesser Goldfinch      | 36.17 ( 33.98 38.36 ) | EWLr ( $> T_{uc}$ ) | 0.051 ( 0.044 0.058 ) | -2.09 ( -2.41 -1.78 )    |
| House Finch           | 39.33 ( 35.06 43.61 ) | EWLr ( $> T_{uc}$ ) | 0.100 ( 0.090 0.110 ) | -4.22 ( -4.63 -3.80 )    |
| Pyrrhuloxia           | 39.73 ( 17.48 61.97 ) | EWLr ( $> T_{uc}$ ) | 0.130 ( 0.112 0.149 ) | -5.45 ( -6.28 -4.63 )    |
| Cactus Wren           | 37.00 ( 35.03 38.97 ) | EWLr ( $> T_{uc}$ ) | 0.137 ( 0.119 0.155 ) | -5.85 ( -6.65 -5.05 )    |
| Northern Cardinal     | 37.03 ( 33.75 40.31 ) | EWLr ( $> T_{uc}$ ) | 0.180 ( 0.161 0.198 ) | -7.41 ( -8.22 -6.61 )    |
| Abert's Towhee        | 36.73 ( 34.22 39.24 ) | EWLr ( $> T_{uc}$ ) | 0.151 ( 0.129 0.174 ) | -6.26 ( -7.24 -5.29 )    |
| Curve-billed Thrasher | 42.61 ( 40.22 45.00 ) | EWLr ( $> T_{uc}$ ) | 0.391 ( 0.314 0.468 ) | -17.17 ( -20.71 -13.62 ) |

Notes: Values are means, with 95% confidence intervals in parentheses.

**Table S2.** Mean and  $\pm$  SD values for metabolic variables in seven Sonoran Desert passerine bird species ( $T_{\text{air}} \pm 1^\circ\text{C}$ )

| Species               | $T_{\text{air}}$ ( $^\circ\text{C}$ ) | RMR (W)         | RMR ( $\text{mW g}^{-1}$ ) | EWL ( $\text{g H}_2\text{O hr}^{-1}$ ) | EWL (% of Mb $\text{hr}^{-1}$ ) | EHL/MHP         | $T_{\text{b}}$ ( $^\circ\text{C}$ ) | n  |
|-----------------------|---------------------------------------|-----------------|----------------------------|----------------------------------------|---------------------------------|-----------------|-------------------------------------|----|
| Lesser Goldfinch      | 35                                    | 0.25 $\pm$ 0.05 | 25.33 $\pm$ 5.37           | 0.19 $\pm$ 0.05                        | 1.94 $\pm$ 0.51                 | 0.52 $\pm$ 0.10 | 41.3 $\pm$ 0.7                      | 17 |
|                       | 42                                    | 0.28 $\pm$ 0.04 | 28.92 $\pm$ 4.14           | 0.41 $\pm$ 0.08                        | 4.18 $\pm$ 0.86                 | 0.97 $\pm$ 0.17 | 42.7 $\pm$ 0.7                      | 8  |
|                       | 48                                    | 0.34 $\pm$ 0.07 | 35.09 $\pm$ 7.07           | 0.74 $\pm$ 0.08                        | 7.61 $\pm$ 0.97                 | 1.48 $\pm$ 0.24 | 43.8 $\pm$ 0.5                      | 7  |
| House Finch           | 35                                    | 0.38 $\pm$ 0.05 | 21.16 $\pm$ 3.19           | 0.15 $\pm$ 0.05                        | 0.85 $\pm$ 0.30                 | 0.27 $\pm$ 0.07 | 41.1 $\pm$ 0.3                      | 8  |
|                       | 42                                    | 0.45 $\pm$ 0.06 | 25.11 $\pm$ 3.81           | 0.50 $\pm$ 0.10                        | 2.74 $\pm$ 0.61                 | 0.73 $\pm$ 0.13 | 42.9 $\pm$ 0.4                      | 13 |
|                       | 48                                    | 0.54 $\pm$ 0.05 | 29.65 $\pm$ 3.52           | 1.20 $\pm$ 0.06                        | 6.63 $\pm$ 0.59                 | 1.51 $\pm$ 0.19 | 43.9 $\pm$ 0.5                      | 6  |
| Pyrrhuloxia           | 35                                    | 0.65 $\pm$ 0.15 | 19.45 $\pm$ 4.66           | 0.66 $\pm$ 0.30                        | 1.98 $\pm$ 0.91                 | 0.66 $\pm$ 0.16 | 41.0 $\pm$ 1.3                      | 2  |
|                       | 42                                    | 0.66 $\pm$ 0.18 | 19.74 $\pm$ 5.49           | 0.95 $\pm$ 0.08                        | 2.84 $\pm$ 0.33                 | 0.98 $\pm$ 0.18 | 42.2 $\pm$ 1.4                      | 2  |
|                       | 48                                    | 0.78 $\pm$ 0.14 | 23.33 $\pm$ 4.45           | 1.70 $\pm$ 0.03                        | 5.05 $\pm$ 0.40                 | 1.47 $\pm$ 0.23 | 43.7 $\pm$ 0.1                      | 2  |
| Cactus Wren           | 35                                    | 0.45 $\pm$ 0.05 | 13.07 $\pm$ 1.64           | 0.23 $\pm$ 0.08                        | 0.66 $\pm$ 0.23                 | 0.34 $\pm$ 0.10 | 41.1 $\pm$ 0.8                      | 8  |
|                       | 42                                    | 0.49 $\pm$ 0.05 | 14.26 $\pm$ 1.83           | 0.66 $\pm$ 0.10                        | 1.90 $\pm$ 0.33                 | 0.90 $\pm$ 0.14 | 42.3 $\pm$ 0.6                      | 10 |
|                       | 48                                    | 0.59 $\pm$ 0.08 | 17.12 $\pm$ 2.61           | 1.54 $\pm$ 0.26                        | 4.46 $\pm$ 0.83                 | 1.74 $\pm$ 0.19 | 43.8 $\pm$ 0.6                      | 8  |
| Northern Cardinal     | 35                                    | 0.62 $\pm$ 0.07 | 15.80 $\pm$ 2.06           | 0.35 $\pm$ 0.13                        | 0.88 $\pm$ 0.33                 | 0.37 $\pm$ 0.12 | 40.8 $\pm$ 0.7                      | 7  |
|                       | 42                                    | 0.80 $\pm$ 0.17 | 20.40 $\pm$ 4.60           | 1.05 $\pm$ 0.22                        | 2.67 $\pm$ 0.60                 | 0.88 $\pm$ 0.10 | 42.6 $\pm$ 1.0                      | 6  |
|                       | 48                                    | 1.03 $\pm$ 0.15 | 26.23 $\pm$ 4.16           | 2.07 $\pm$ 0.27                        | 5.25 $\pm$ 0.77                 | 1.34 $\pm$ 0.05 | 43.8 $\pm$ 0.2                      | 4  |
| Abert's Towhee        | 35                                    | 0.71 $\pm$ 0.13 | 16.99 $\pm$ 3.30           | 0.42 $\pm$ 0.11                        | 1.00 $\pm$ 0.28                 | 0.39 $\pm$ 0.08 | 42.0 $\pm$ 0.9                      | 18 |
|                       | 42                                    | 0.80 $\pm$ 0.14 | 19.21 $\pm$ 3.61           | 1.05 $\pm$ 0.15                        | 2.51 $\pm$ 0.40                 | 0.90 $\pm$ 0.20 | 42.5 $\pm$ 0.4                      | 13 |
|                       | 48                                    | 0.85 $\pm$ 0.06 | 20.34 $\pm$ 2.10           | 1.98 $\pm$ 0.19                        | 4.74 $\pm$ 0.57                 | 1.56 $\pm$ 0.05 | 43.7 $\pm$ 0.5                      | 4  |
| Curve-billed Thrasher | 35                                    | 0.86 $\pm$ 0.09 | 12.20 $\pm$ 1.87           | 0.50 $\pm$ 0.16                        | 0.70 $\pm$ 0.25                 | 0.38 $\pm$ 0.11 | 40.6 $\pm$ 0.4                      | 6  |
|                       | 42                                    | 0.93 $\pm$ 0.07 | 13.14 $\pm$ 1.81           | 1.36 $\pm$ 0.22                        | 1.92 $\pm$ 0.38                 | 0.98 $\pm$ 0.18 | 41.9 $\pm$ 0.5                      | 7  |
|                       | 48                                    | 1.34 $\pm$ 0.18 | 18.83 $\pm$ 3.30           | 3.06 $\pm$ 0.26                        | 4.31 $\pm$ 0.62                 | 1.54 $\pm$ 0.11 | 43.7 $\pm$ 0.6                      | 6  |

**Table S3.** Slope (m) and intercept (b) of metabolic variables as functions of air temperature ( $T_{\text{air}}$ ) in seven Sonoran Desert bird species.

| Species               | Regression                            | m     |         |         | b     |          |         |
|-----------------------|---------------------------------------|-------|---------|---------|-------|----------|---------|
| Lesser Goldfinch      | RMR > $T_{\text{uc}}$                 | 0.009 | ( 0.005 | 0.014 ) | -0.11 | ( -0.31  | 0.09 )  |
| House Finch           | RMR > $T_{\text{uc}}$                 | 0.016 | ( 0.011 | 0.021 ) | -0.25 | ( -0.46  | -0.03 ) |
| Pyrrhuloxia           | RMR > $T_{\text{uc}}$                 | 0.025 | ( 0.010 | 0.040 ) | -0.44 | ( -1.12  | 0.24 )  |
| Cactus Wren           | RMR > $T_{\text{uc}}$                 | 0.018 | ( 0.013 | 0.024 ) | -0.28 | ( -0.52  | -0.05 ) |
| Northern Cardinal     | RMR > $T_{\text{uc}}$                 | 0.040 | ( 0.029 | 0.051 ) | -0.90 | ( -1.40  | -0.40 ) |
| Abert's Towhee        | RMR > $T_{\text{uc}}$                 | 0.019 | ( 0.005 | 0.033 ) | -0.03 | ( -0.65  | 0.59 )  |
| Curve-billed Thrasher | RMR > $T_{\text{uc}}$                 | 0.097 | ( 0.058 | 0.135 ) | -3.31 | ( -5.09  | -1.53 ) |
| Curve-billed Thrasher | RMR > $36^{\circ}\text{C}$            | 0.060 | ( 0.042 | 0.078 ) | -1.60 | ( -2.39  | -0.82 ) |
| Lesser Goldfinch      | EWL > $36^{\circ}\text{C}$            | 0.052 | ( 0.044 | 0.059 ) | -1.74 | ( -2.07  | -1.42 ) |
| House Finch           | EWL > $36^{\circ}\text{C}$            | 0.098 | ( 0.089 | 0.108 ) | -3.62 | ( -4.04  | -3.19 ) |
| Pyrrhuloxia           | EWL > $36^{\circ}\text{C}$            | 0.132 | ( 0.114 | 0.151 ) | -4.71 | ( -5.56  | -3.86 ) |
| Cactus Wren           | EWL > $36^{\circ}\text{C}$            | 0.137 | ( 0.119 | 0.155 ) | -5.03 | ( -5.83  | -4.23 ) |
| Northern Cardinal     | EWL > $36^{\circ}\text{C}$            | 0.180 | ( 0.163 | 0.198 ) | -6.50 | ( -7.28  | -5.72 ) |
| Abert's Towhee        | EWL > $36^{\circ}\text{C}$            | 0.151 | ( 0.129 | 0.173 ) | -5.26 | ( -6.22  | -4.30 ) |
| Curve-billed Thrasher | EWL > $36^{\circ}\text{C}$            | 0.270 | ( 0.225 | 0.314 ) | -9.94 | ( -11.92 | -7.97 ) |
| Lesser Goldfinch      | EHL/MHP > $36^{\circ}\text{C}$        | 0.083 | ( 0.073 | 0.094 ) | -2.53 | ( -2.98  | -2.07 ) |
| House Finch           | EHL/MHP > $36^{\circ}\text{C}$        | 0.111 | ( 0.100 | 0.122 ) | -3.89 | ( -4.39  | -3.40 ) |
| Pyrrhuloxia           | EHL/MHP > $36^{\circ}\text{C}$        | 0.095 | ( 0.068 | 0.122 ) | -3.06 | ( -4.29  | -1.83 ) |
| Cactus Wren           | EHL/MHP > $36^{\circ}\text{C}$        | 0.124 | ( 0.111 | 0.137 ) | -4.20 | ( -4.78  | -3.62 ) |
| Northern Cardinal     | EHL/MHP > $36^{\circ}\text{C}$        | 0.085 | ( 0.071 | 0.099 ) | -2.65 | ( -3.28  | -2.02 ) |
| Abert's Towhee        | EHL/MHP > $36^{\circ}\text{C}$        | 0.099 | ( 0.080 | 0.118 ) | -3.24 | ( -4.07  | -2.40 ) |
| Curve-billed Thrasher | EHL/MHP > $36^{\circ}\text{C}$        | 0.090 | ( 0.070 | 0.110 ) | -2.77 | ( -3.65  | -1.89 ) |
| Lesser Goldfinch      | EHL - MHP > $36^{\circ}\text{C}$      | 0.030 | ( 0.026 | 0.035 ) | 0.02  | ( 0.01   | 0.04 )  |
| House Finch           | EHL - MHP > $36^{\circ}\text{C}$      | 0.059 | ( 0.053 | 0.066 ) | -0.04 | ( -0.06  | -0.02 ) |
| Pyrrhuloxia           | EHL - MHP > $36^{\circ}\text{C}$      | 0.088 | ( 0.070 | 0.106 ) | -0.02 | ( -0.08  | 0.03 )  |
| Cactus Wren           | EHL - MHP > $36^{\circ}\text{C}$      | 0.096 | ( 0.082 | 0.111 ) | 0.03  | ( -0.01  | 0.08 )  |
| Northern Cardinal     | EHL - MHP > $36^{\circ}\text{C}$      | 0.110 | ( 0.097 | 0.122 ) | 0.00  | ( -0.05  | 0.05 )  |
| Abert's Towhee        | EHL - MHP > $36^{\circ}\text{C}$      | 0.101 | ( 0.081 | 0.122 ) | 0.00  | ( -0.06  | 0.06 )  |
| Curve-billed Thrasher | EHL - MHP > $36^{\circ}\text{C}$      | 0.166 | ( 0.132 | 0.200 ) | -0.01 | ( -0.12  | 0.10 )  |
| Lesser Goldfinch      | $T_{\text{b}}$ > $36^{\circ}\text{C}$ | 0.210 | ( 0.159 | 0.260 ) | 33.82 | ( 31.64  | 36.00 ) |
| House Finch           | $T_{\text{b}}$ > $36^{\circ}\text{C}$ | 0.177 | ( 0.145 | 0.209 ) | 35.27 | ( 33.86  | 36.68 ) |
| Pyrrhuloxia           | $T_{\text{b}}$ > $36^{\circ}\text{C}$ | 0.273 | ( 0.243 | 0.304 ) | 30.71 | ( 29.12  | 32.29 ) |
| Cactus Wren           | $T_{\text{b}}$ > $36^{\circ}\text{C}$ | 0.271 | ( 0.234 | 0.308 ) | 30.88 | ( 29.22  | 32.53 ) |
| Northern Cardinal     | $T_{\text{b}}$ > $36^{\circ}\text{C}$ | 0.268 | ( 0.211 | 0.325 ) | 31.26 | ( 28.75  | 33.78 ) |
| Abert's Towhee        | $T_{\text{b}}$ > $36^{\circ}\text{C}$ | 0.194 | ( 0.162 | 0.227 ) | 34.37 | ( 32.95  | 35.79 ) |
| Curve-billed Thrasher | $T_{\text{b}}$ > $36^{\circ}\text{C}$ | 0.316 | ( 0.277 | 0.355 ) | 28.59 | ( 26.84  | 30.34 ) |

Notes: Values are means, with 95% confidence intervals in parentheses.

 $T_{\text{air}}$  is the abscissa in all cases but EHL - MHP, where it is  $T_{\text{air}} - T_{\text{b}}$ .

**Table S4.** Slope (m) and intercept (b) of (EHL-MHP)/M<sub>b</sub> and MHP/M<sub>b</sub> as a function of the gradient (T<sub>air</sub> - T<sub>b</sub>) for T<sub>air</sub> above 36°C in eight Sonoran Desert bird species.

| Species               | Regression                      | m    |        |        | b     |         |         |
|-----------------------|---------------------------------|------|--------|--------|-------|---------|---------|
| Lesser Goldfinch      | (EHL-MHP)/M <sub>b</sub> > 36°C | 3.16 | ( 2.70 | 3.61 ) | 2.18  | ( 0.63  | 3.72 )  |
| House Finch           | (EHL-MHP)/M <sub>b</sub> > 36°C | 3.31 | ( 2.94 | 3.67 ) | -2.49 | ( -3.74 | -1.25 ) |
| Cactus Wren           | (EHL-MHP)/M <sub>b</sub> > 36°C | 2.84 | ( 2.39 | 3.29 ) | 0.96  | ( -0.36 | 2.29 )  |
| Northern Cardinal     | (EHL-MHP)/M <sub>b</sub> > 36°C | 2.70 | ( 2.38 | 3.03 ) | -0.13 | ( -1.45 | 1.20 )  |
| Abert's Towhee        | (EHL-MHP)/M <sub>b</sub> > 36°C | 2.38 | ( 1.91 | 2.85 ) | 0.12  | ( -1.28 | 1.52 )  |
| Curve-billed Thrasher | (EHL-MHP)/M <sub>b</sub> > 36°C | 2.25 | ( 1.81 | 2.69 ) | -0.19 | ( -1.69 | 1.31 )  |
| Mourning Dove         | (EHL-MHP)/M <sub>b</sub> > 36°C | 1.10 | ( 1.02 | 1.18 ) | 1.31  | ( 0.45  | 2.17 )  |
| Gambel's Quail        | (EHL-MHP)/M <sub>b</sub> > 36°C | 0.84 | ( 0.72 | 0.97 ) | 1.01  | ( 0.20  | 1.81 )  |
| Lesser Goldfinch      | MHP/M <sub>b</sub> > 36°C       | 0.93 | ( 0.35 | 1.52 ) | 29.96 | ( 28.11 | 31.81 ) |
| House Finch           | MHP/M <sub>b</sub> > 36°C       | 0.99 | ( 0.65 | 1.33 ) | 24.93 | ( 23.98 | 25.89 ) |
| Cactus Wren           | MHP/M <sub>b</sub> > 36°C       | 0.63 | ( 0.41 | 0.85 ) | 14.45 | ( 13.78 | 15.13 ) |
| Northern Cardinal     | MHP/M <sub>b</sub> > 36°C       | 1.16 | ( 0.72 | 1.59 ) | 20.50 | ( 17.85 | 23.14 ) |
| Abert's Towhee        | MHP/M <sub>b</sub> > 36°C       | 0.57 | ( 0.18 | 0.96 ) | 18.95 | ( 18.09 | 19.82 ) |
| Curve-billed Thrasher | MHP/M <sub>b</sub> > 36°C       | 0.84 | ( 0.48 | 1.19 ) | 13.42 | ( 12.31 | 14.53 ) |
| Mourning Dove         | MHP/M <sub>b</sub> > 36°C       | 0.09 | ( 0.04 | 0.14 ) | 6.93  | ( 6.35  | 7.51 )  |
| Gambel's Quail        | MHP/M <sub>b</sub> > 36°C       | 0.15 | ( 0.07 | 0.24 ) | 5.09  | ( 4.67  | 5.51 )  |

Notes: Values are means, with 95% confidence intervals in parentheses. The abscissa is T<sub>air</sub> - T<sub>b</sub>.  
The data for the last 2 species are from Smith et al. (2015).
